# Supplementary material
Source: PubMed Central journal article supplement (PMC5528474)
Supplement: MOL2-7-704-s007.pdf [file MOL2-7-704-s007.pdf]

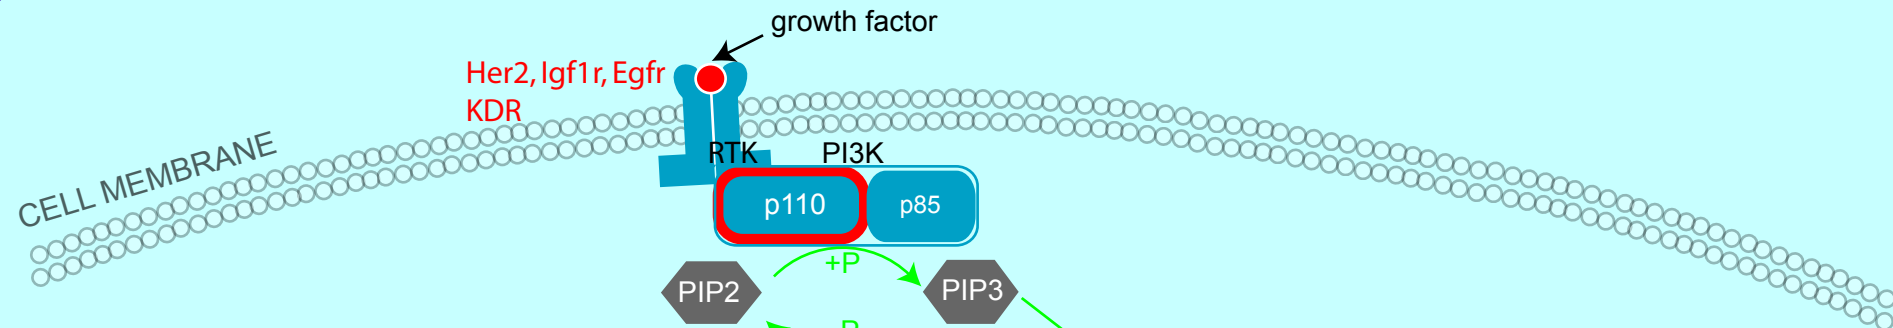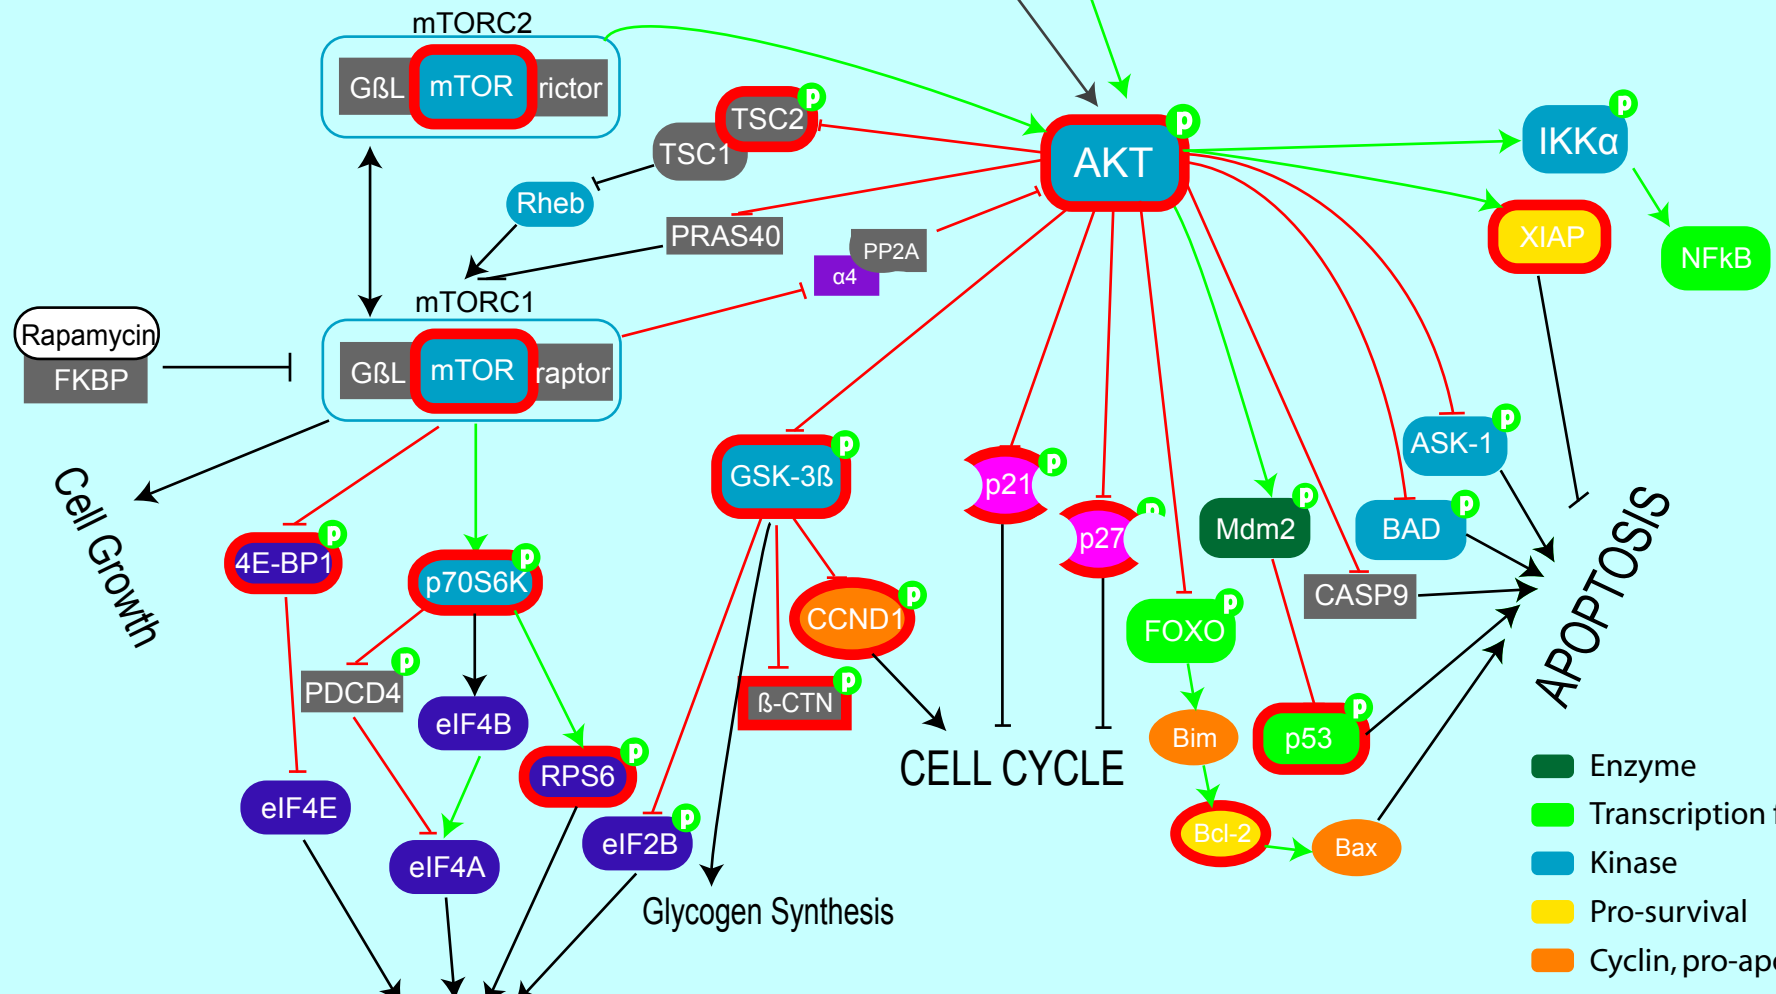

Supplementary figure 1

- Enzyme
- Transcription factor
- Kinase
- Pro-survival
- Cyclin, pro-apoptic
- Translation initiator
- Cyclin-dependent kinase inhibitor
- Phosphatase
- not defined
