# Supplementary material
Source: PubMed Central journal article supplement (PMC5528474)

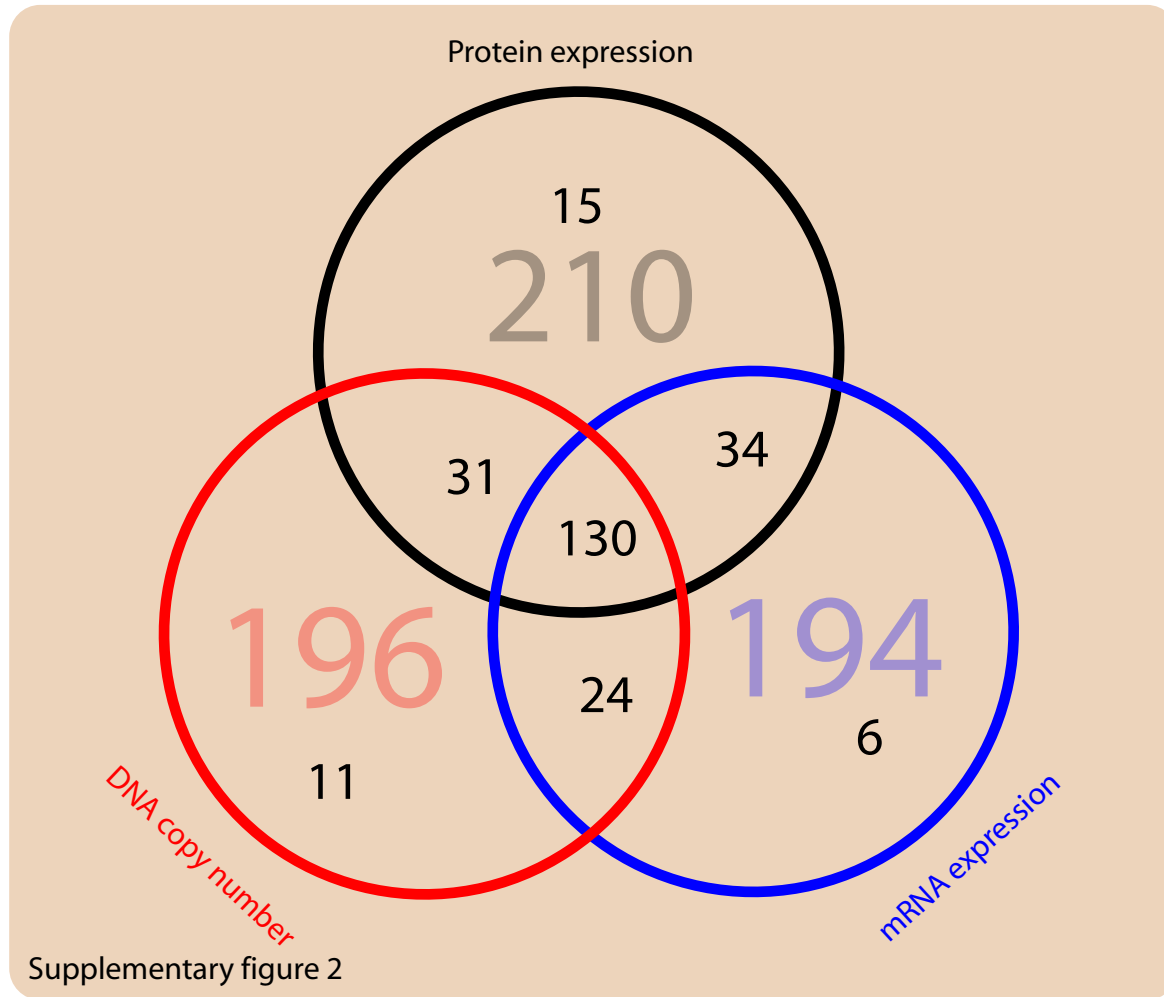

Supplement: MOL2-7-704-s008.pdf [file MOL2-7-704-s008.pdf]

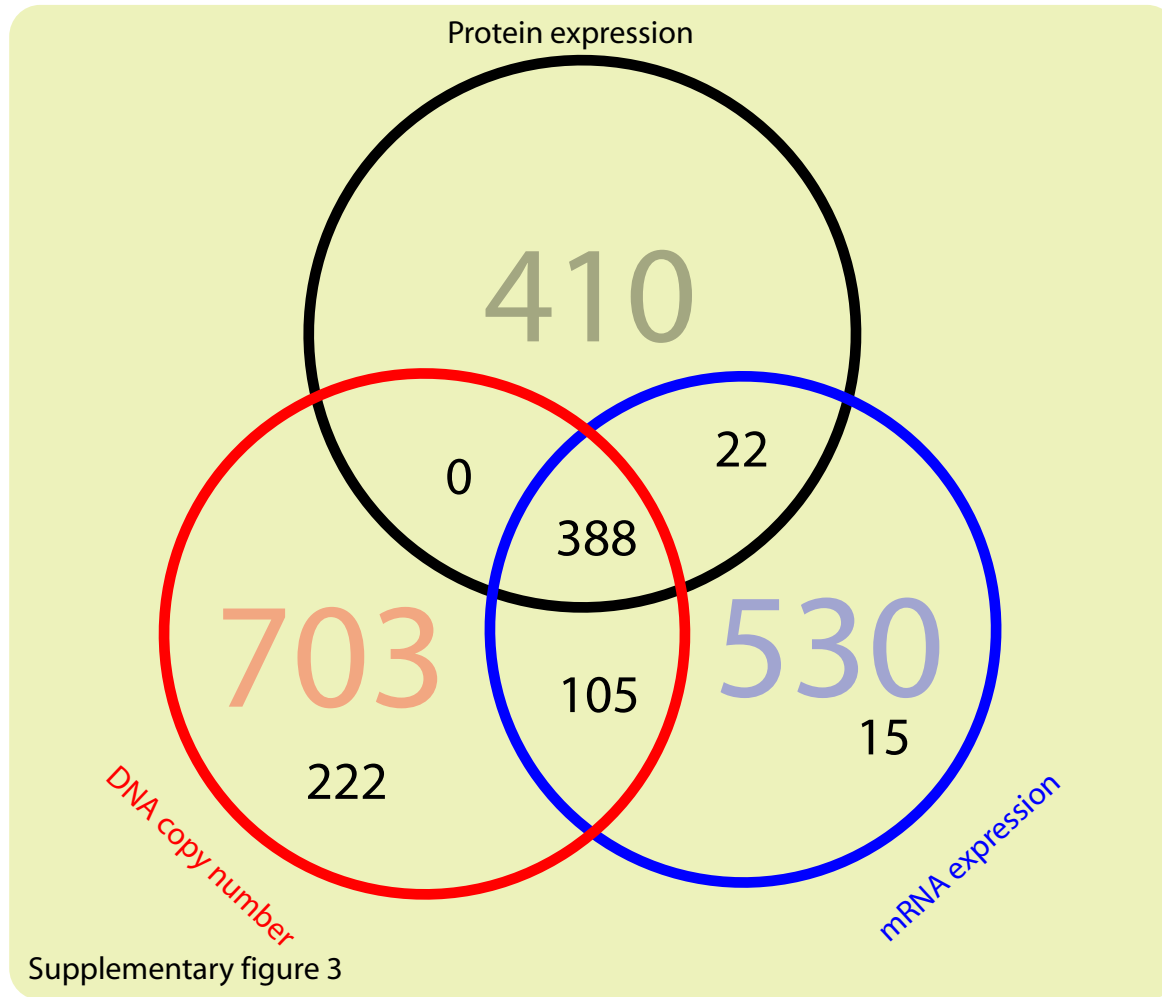

Supplement: MOL2-7-704-s009.pdf [file MOL2-7-704-s009.pdf]

# ERBB2 gene vs copy number

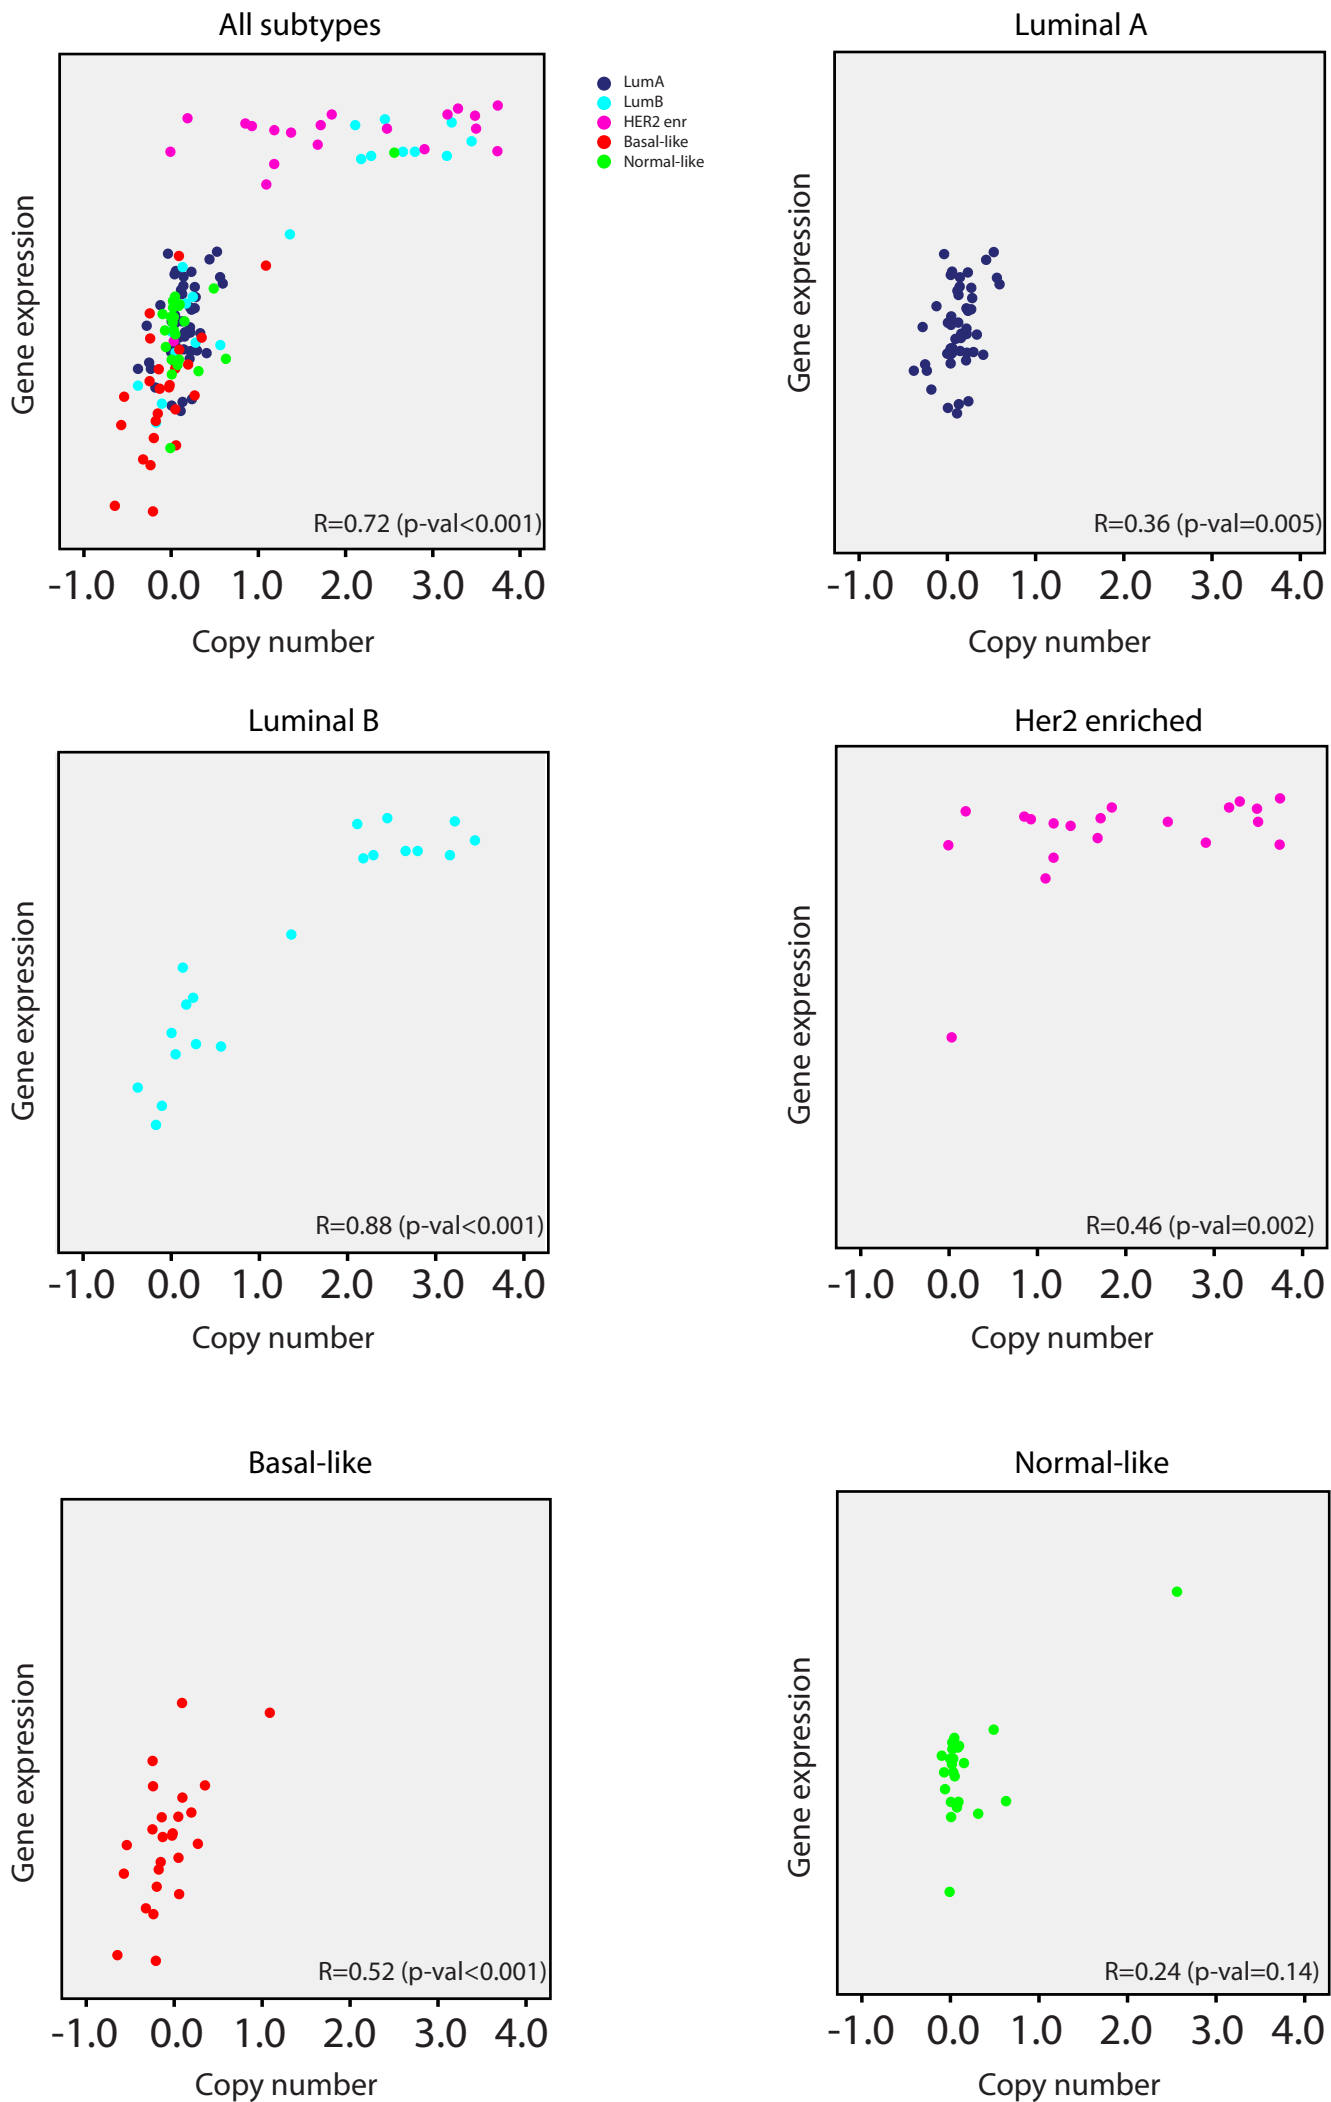

Supplement: MOL2-7-704-s010.pdf [file MOL2-7-704-s010.pdf]

# ERBB2 gene vs HER2p1248 protein

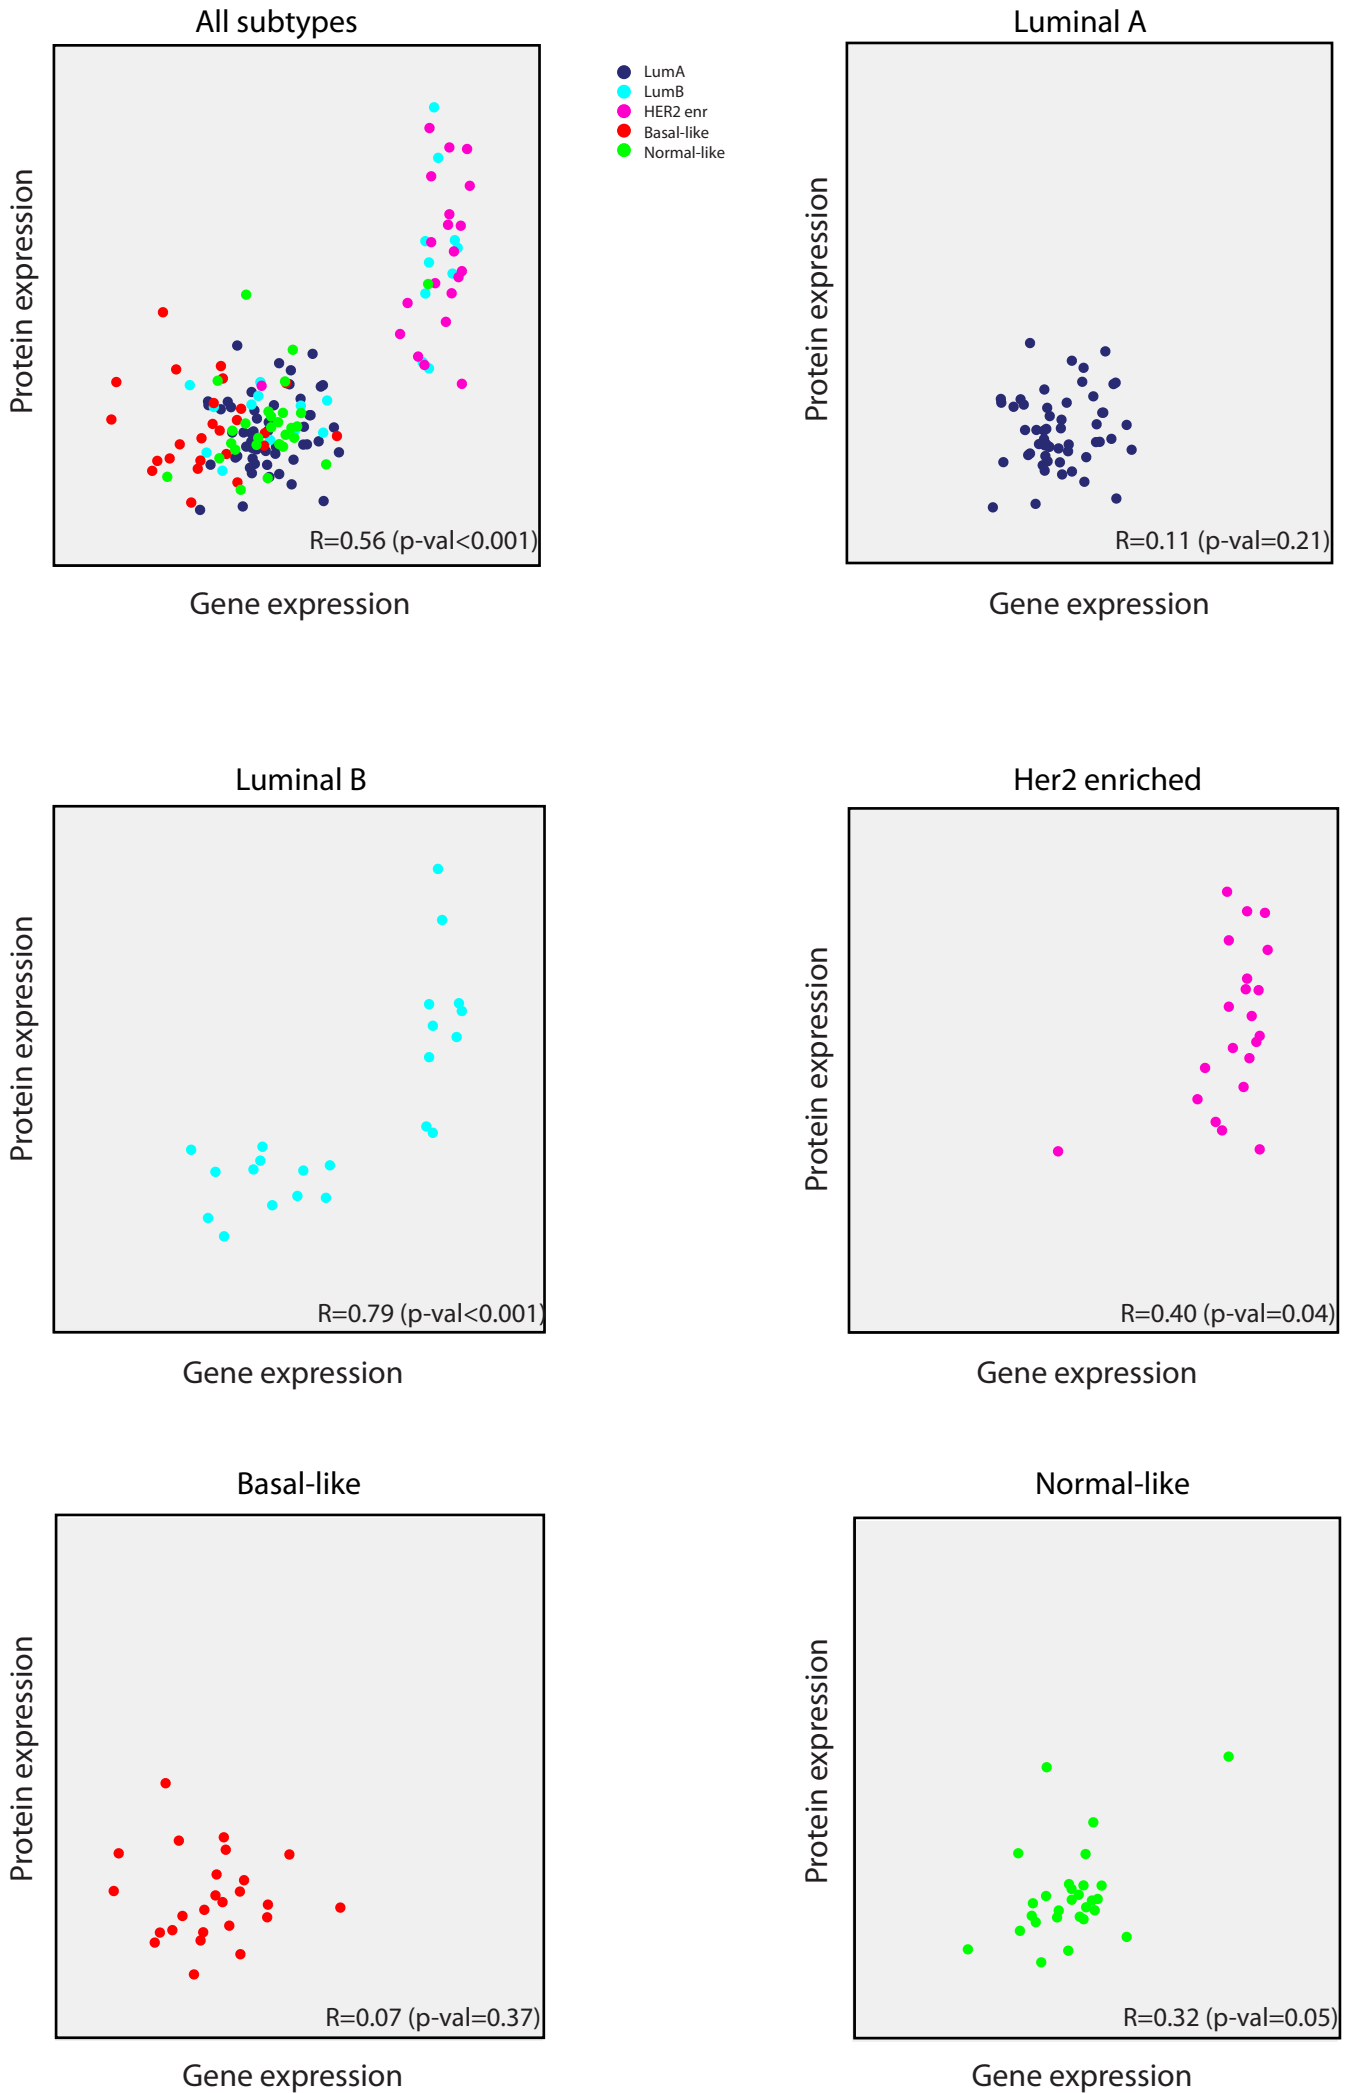

Supplement: MOL2-7-704-s011.pdf [file MOL2-7-704-s011.pdf]

# ERBB2 copy number vs HER2p1248 protein

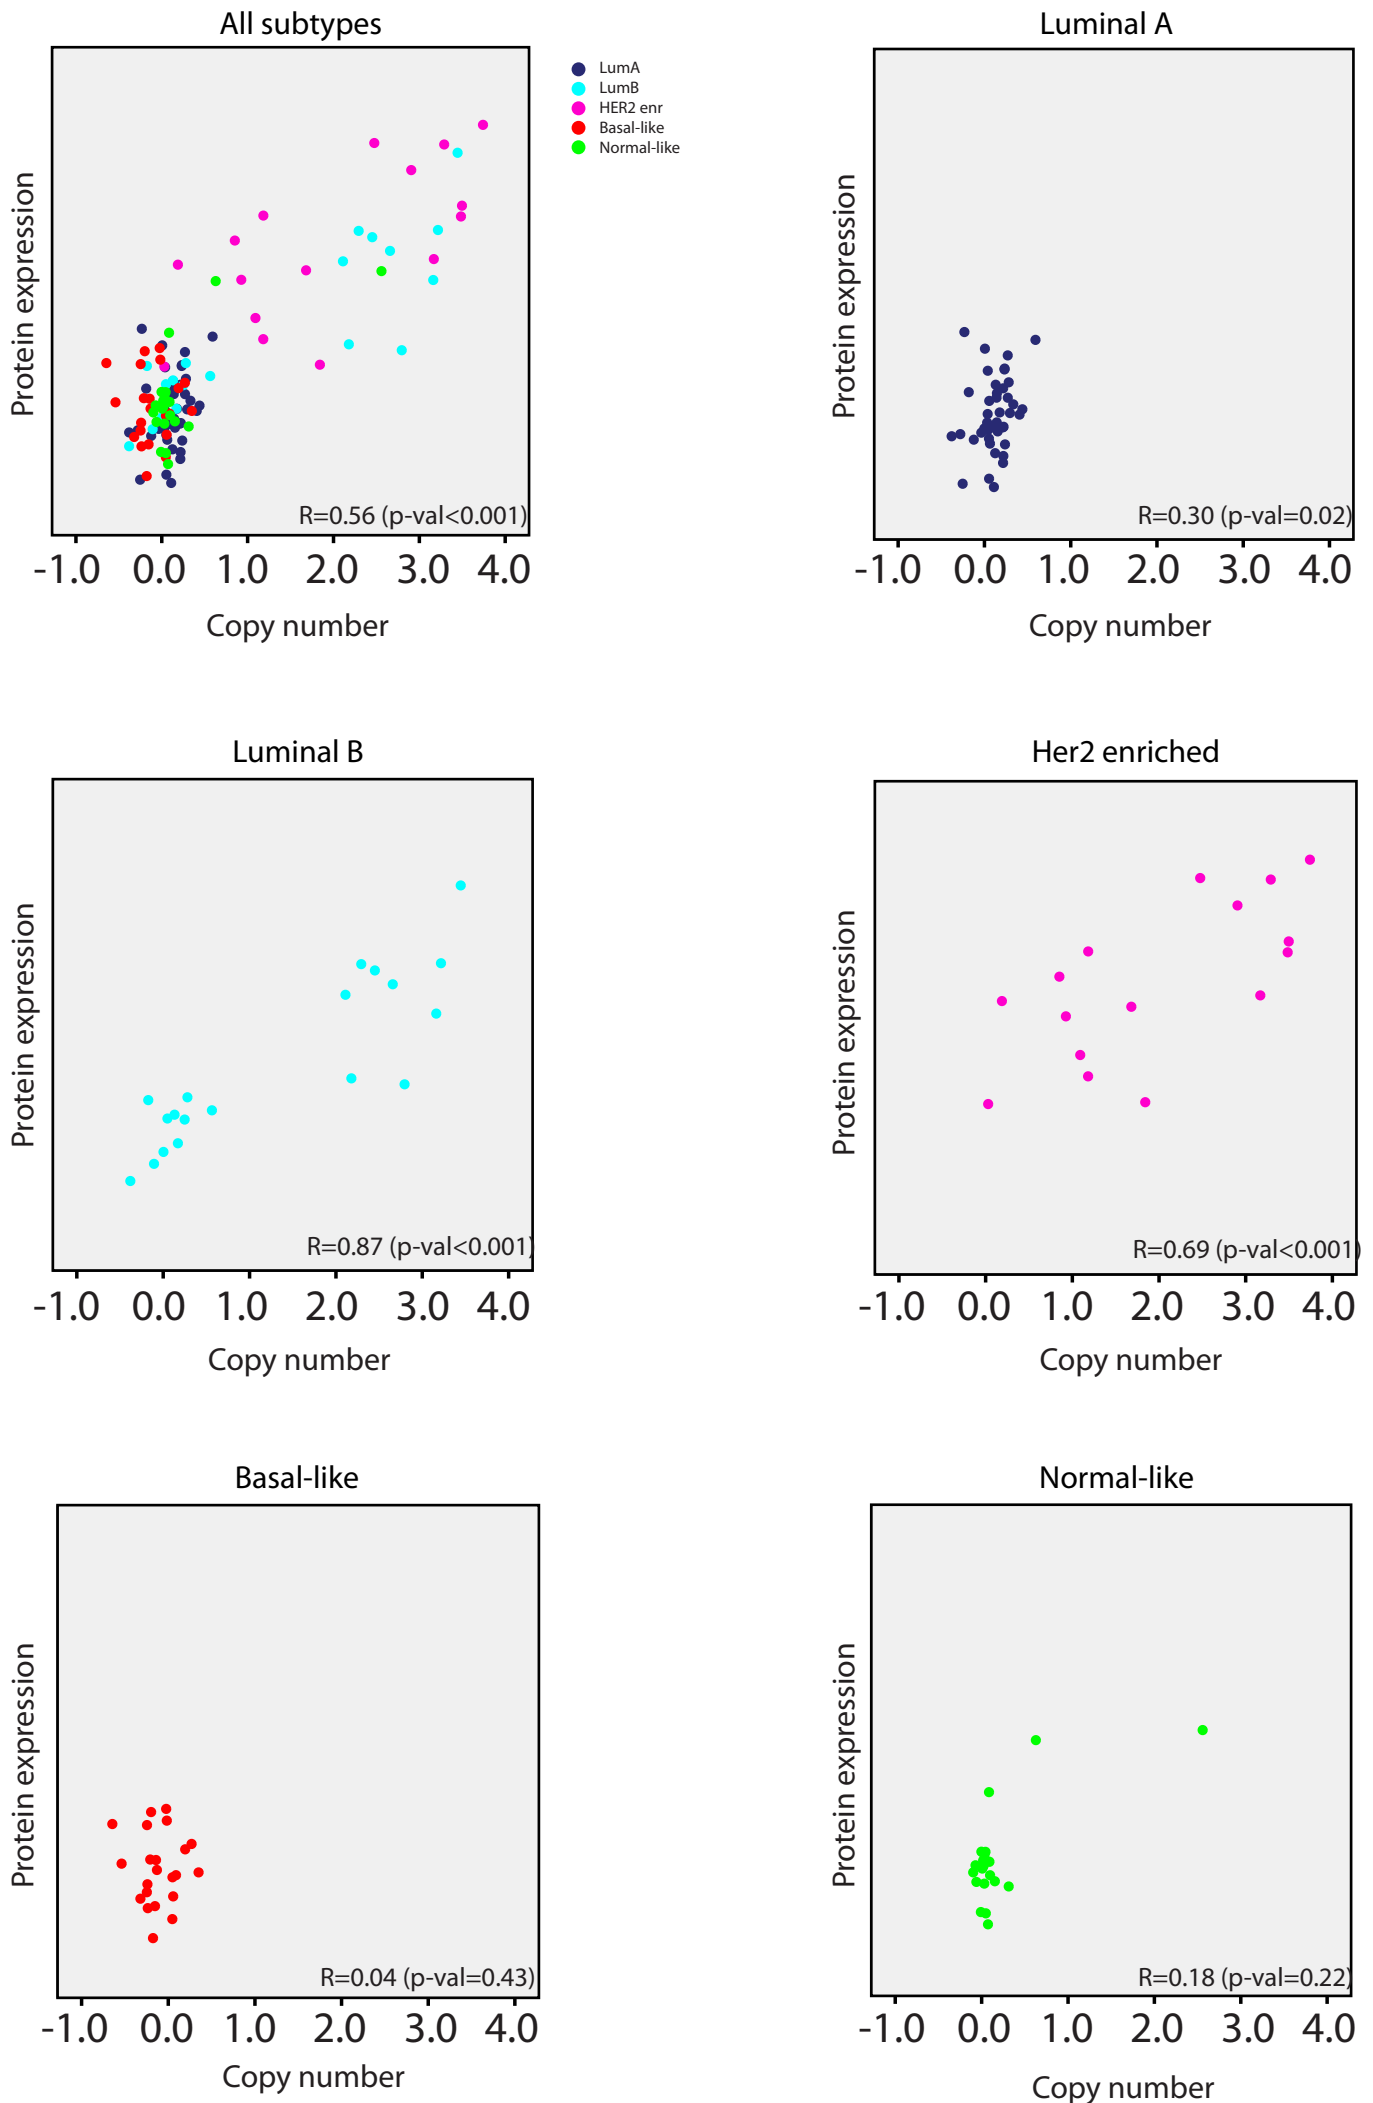

Supplement: MOL2-7-704-s013.pdf [file MOL2-7-704-s013.pdf]

ERBB2 / Her2p1248

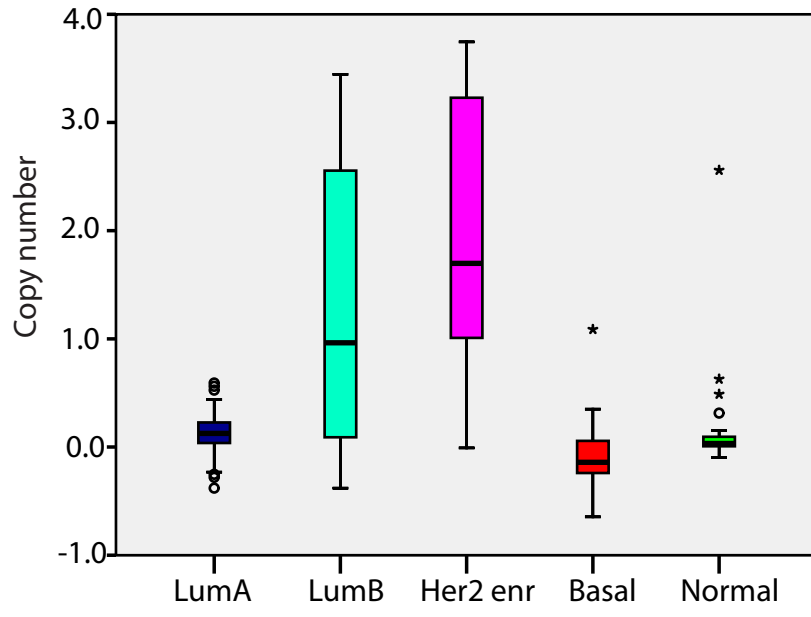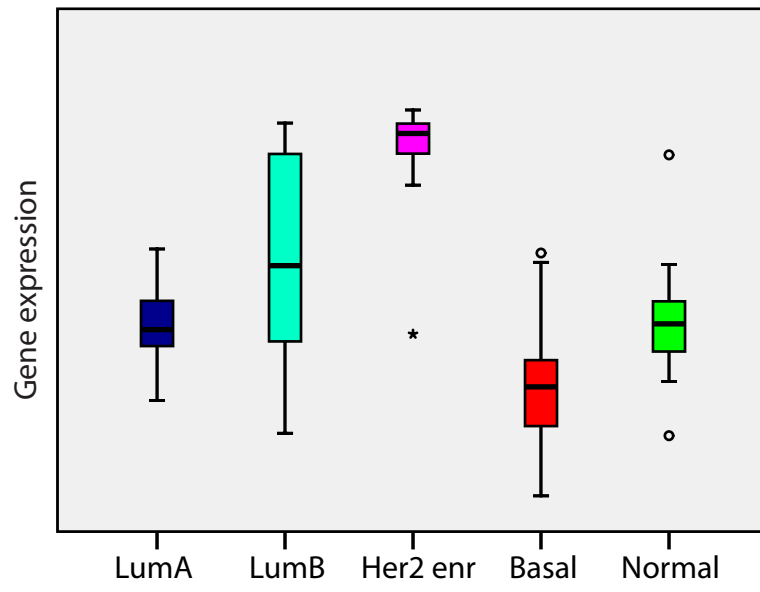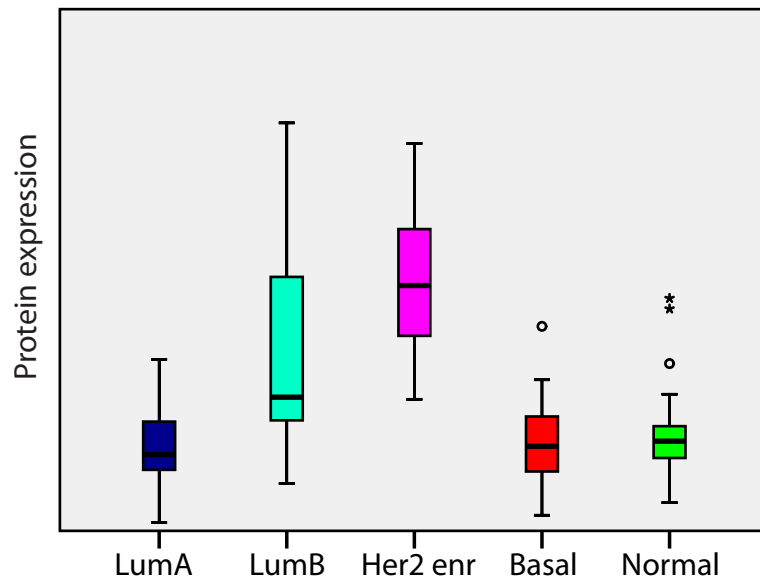

Supplement: MOL2-7-704-s014.pdf [file MOL2-7-704-s014.pdf]

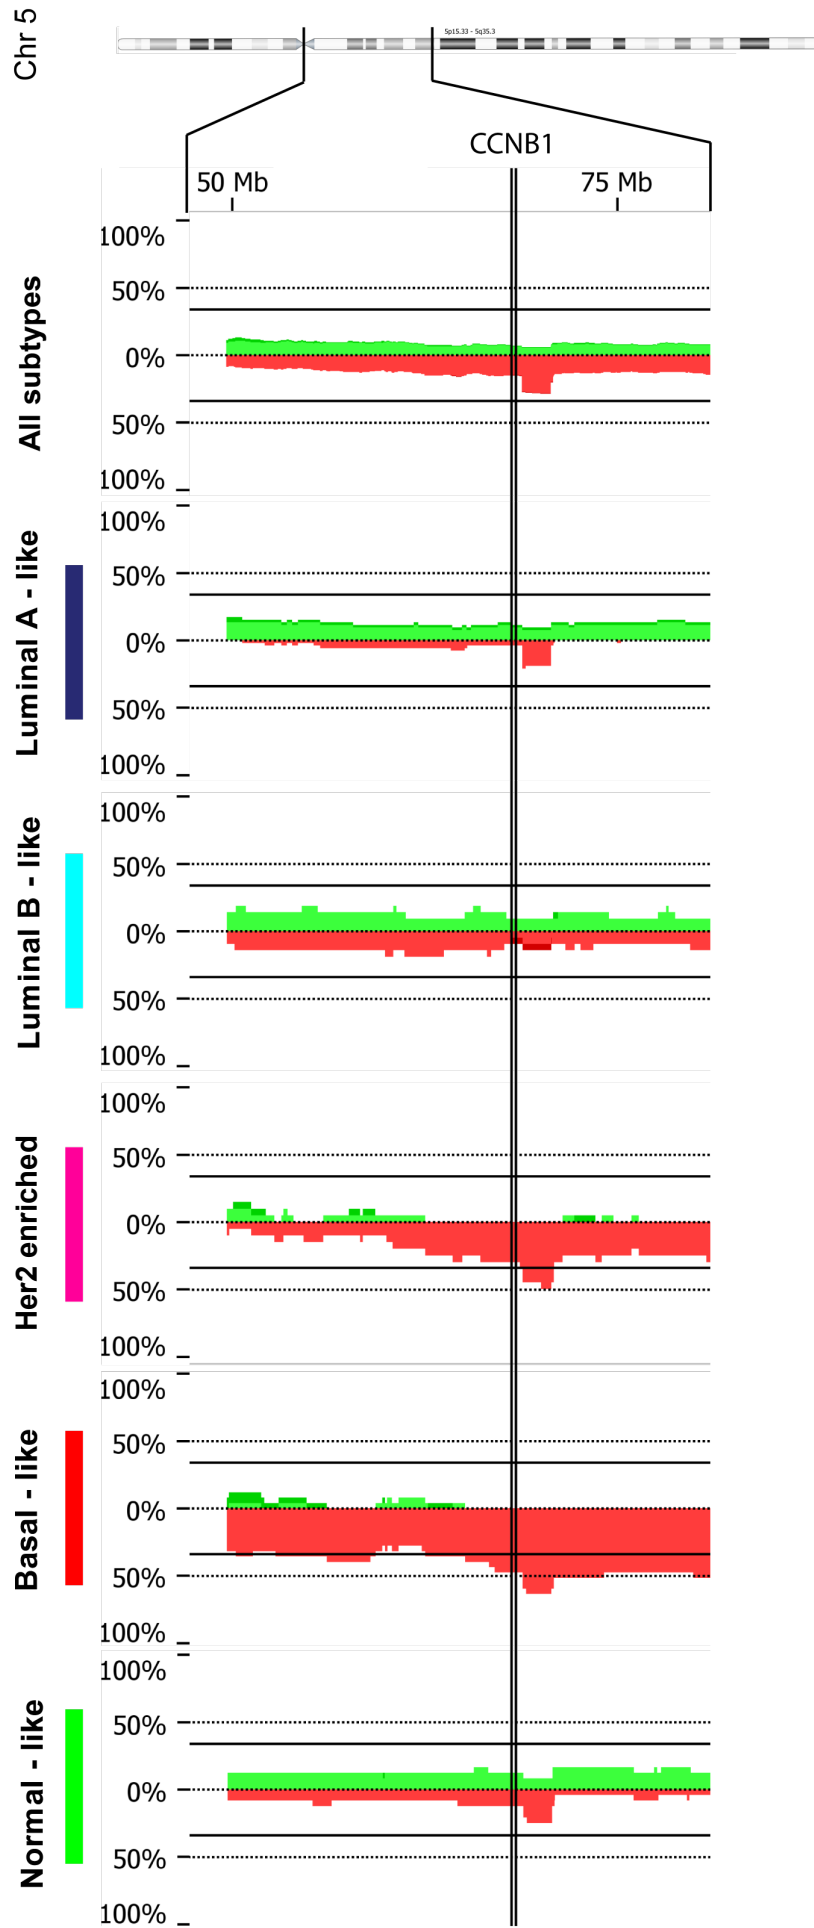

Supplementary figure 5

Supplement: MOL2-7-704-s015.pdf [file MOL2-7-704-s015.pdf]
